# Supplementary material for: Current realities versus theoretical optima: quantifying efficiency and sociospatial equity of travel time to hospitals in low-income and middle-income countries
Source: PubMed Central journal article supplement (PMC6730570; doi:10.1136/bmjgh-2019-001552), 2019-08-21
Supplement: bmjgh-2019-001552supp001.pdf [file bmjgh-2019-001552supp001.pdf]

## Supplementary A. Facility data from Master Facility List (MFL)

|                                                          | Kenya | Malawi           | Nigeria | Tanzania |
|----------------------------------------------------------|-------|------------------|---------|----------|
| Number of facilities                                     | 9430  | 977              | 33850   | 7783     |
| Number of hospitals                                      | 485   | 116              | 3787    | 265      |
| Number of hospital per 1,000 km <sup>2</sup> land area   | 0.85  | 1.23             | 4.16    | 0.30     |
| Number of hospital per 10,000 population                 | 0.10  | 0.07             | 0.21    | 0.05     |
| Number of hospitals with no geographic coordinates       | 5     | 0                | 0       | 9        |
| Number of hospitals included in the main analysis        | 480   | 115 <sup>+</sup> | 3787    | 256      |
| Number of public hospitals included in the main analysis | 390   | 50               | 1244    | 119      |

<sup>+</sup> One hospital on Likoma Island was excluded from the analysis.

## Number of hospitals per 10,000 population by first administrative division

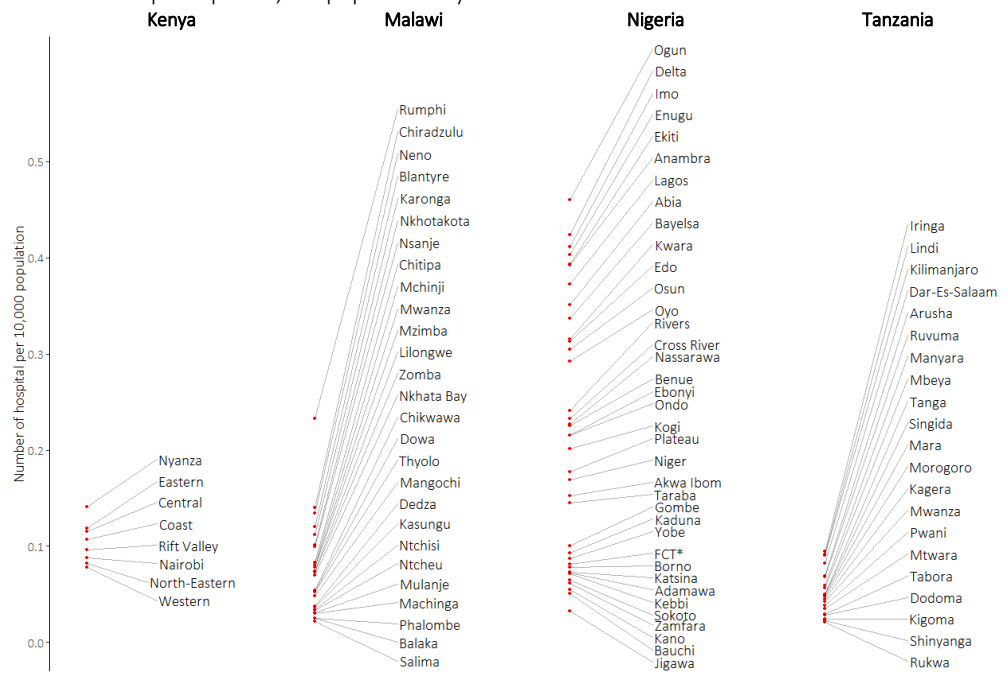

\*FCT = Federal Capital Territory
