# Supplementary material for: Current realities versus theoretical optima: quantifying efficiency and sociospatial equity of travel time to hospitals in low-income and middle-income countries
Source: PubMed Central journal article supplement (PMC6730570; doi:10.1136/bmjgh-2019-001552), 2019-08-21
Supplement: bmjgh-2019-001552supp002.pdf [file bmjgh-2019-001552supp002.pdf]

Supplementary B. Observed and simulated hospitals locations and travel time to the nearest hospital (in minutes)

|          |                                           | All hospitals       |            |                      |                      | Public hospitals only |            |                      |                      |
|----------|-------------------------------------------|---------------------|------------|----------------------|----------------------|-----------------------|------------|----------------------|----------------------|
|          |                                           | Time <sub>all</sub> | Equity gap | Time <sub>poor</sub> | Time <sub>rich</sub> | Time <sub>all</sub>   | Equity gap | Time <sub>poor</sub> | Time <sub>rich</sub> |
| Kenya    | Observed                                  | 43.6                | 119.4      | 130.2                | 10.8                 | 43.9                  | 118.8      | 130.2                | 11.4                 |
|          | Most efficient (min time <sub>all</sub> ) | 42.7                | 104.4      | 115.3                | 10.9                 | 43.2                  | 110.5      | 122.0                | 11.5                 |
|          | Most equitable (min(abs(equity gap)))     | (n=480) 72.1        | 25.1       | 103.7                | 78.6                 | (n=390) 79.5          | 24.0       | 108.7                | 84.7                 |
|          | Pro-poor (min(time <sub>poor</sub> ))     | 70.2                | 26.5       | 101.0                | 74.5                 | 69.0                  | 68.0       | 106.2                | 38.3                 |
|          | Pro-rich (min(time <sub>rich</sub> ))     | 44.6                | 123.4      | 133.9                | 10.5                 | 44.6                  | 123.7      | 134.8                | 11.1                 |
| Malawi   | Observed                                  | 37.7                | 41.4       | 53.3                 | 11.8                 | 44.0                  | 52.3       | 66.3                 | 13.9                 |
|          | Most efficient (min time <sub>all</sub> ) | 36.1                | 32.7       | 44.6                 | 11.9                 | 42.5                  | 37.9       | 51.9                 | 13.9                 |
|          | Most equitable (min(abs(equity gap)))     | (n=115) 49.0        | <0.1       | 39.1                 | 39.0                 | (n=50) 70.4           | <0.1       | 56.5                 | 56.5                 |
|          | Pro-poor (min(time <sub>poor</sub> ))     | 52.9                | -3.8       | 37.8                 | 41.6                 | 63.1                  | 3.8        | 45.5                 | 41.7                 |
|          | Pro-rich (min(time <sub>rich</sub> ))     | 38.5                | 41.5       | 53.0                 | 11.5                 | 45.5                  | 49.7       | 62.4                 | 12.8                 |
| Nigeria  | Observed                                  | 46.0                | 45.5       | 58.9                 | 13.4                 | 48.3                  | 44.7       | 60.1                 | 15.5                 |
|          | Most efficient (min time <sub>all</sub> ) | 40.1                | 37.5       | 50.0                 | 12.5                 | 47.5                  | 50.6       | 61.7                 | 11.1                 |
|          | Most equitable (min(abs(equity gap)))     | (n=3787) 47.7       | 1.2        | 46.7                 | 45.5                 | (n=1244) 63.6         | 0.1        | 60.2                 | 60.1                 |
|          | Pro-poor (min(time <sub>poor</sub> ))     | 46.0                | 32.0       | 45.8                 | 13.9                 | 61.8                  | 26.5       | 58.9                 | 32.4                 |
|          | Pro-rich (min(time <sub>rich</sub> ))     | 45.1                | 49.9       | 59.0                 | 9.1                  | 49.3                  | 52.1       | 63.1                 | 10.9                 |
| Tanzania | Observed                                  | 78.9                | 167.4      | 180.1                | 12.7                 | 92.3                  | 183.6      | 198.4                | 14.8                 |
|          | Most efficient (min time <sub>all</sub> ) | 78.2                | 161.9      | 175.2                | 13.3                 | 90.6                  | 186.1      | 201.5                | 15.3                 |
|          | Most equitable (min(abs(equity gap)))     | (n=256) 138.1       | <0.1       | 168.7                | 168.8                | (n=119) 168.7         | 0.1        | 198.2                | 198.1                |
|          | Pro-poor (min(time <sub>poor</sub> ))     | 129.5               | 55.7       | 150.2                | 94.5                 | 168.1                 | 96.8       | 183.8                | 87.0                 |
|          | Pro-rich (min(time <sub>rich</sub> ))     | 83.3                | 174.1      | 186.3                | 12.1                 | 96.9                  | 188.0      | 201.4                | 13.4                 |
